# Supplementary material for: Relative contributions of non-essential Sec pathway components and cell envelope-associated proteases to high-level enzyme secretion by Bacillus subtilis
Source: PubMed Central journal article supplement (PMC7048088; doi:10.1186/s12934-020-01315-2), 2020-02-28
Supplement: 12934_2020_1315_MOESM1_ESM.pdf [file 12934_2020_1315_MOESM1_ESM.pdf]

Additional file 1 to:

**Relative contributions of non-essential Sec pathway components and cell envelope-associated proteases to high-level enzyme secretion by *Bacillus subtilis***

Jolanda Neef<sup>1</sup>, Cristina Bongiorno<sup>2</sup>, Brian Schmidt<sup>2</sup>, Vivianne J. Goosens<sup>1</sup>, Jan Maarten van Dijk<sup>1#</sup>.

<sup>1</sup>University of Groningen, University Medical Center Groningen, Department of Medical Microbiology, Hanzeplein 1, P.O. Box 30001, 9700 RB Groningen, The Netherlands

<sup>2</sup>DuPont Industrial Biosciences, 925 Page Mill Road, Palo Alto, CA 94304, United States

**Table S1:** Strains used in this study

| <b><i>B. subtilis</i> strain</b> | <b>Relevant genotypes and phenotypes</b>                                                                                                         | <b>Source or reference</b> |
|----------------------------------|--------------------------------------------------------------------------------------------------------------------------------------------------|----------------------------|
| $\Delta upp$                     | <i>degUHy32, amyE::xylRPxylAcomK-ermC, \Delta upp::neoR</i> ; Em <sup>R</sup> , Neo <sup>R</sup>                                                 | [1]                        |
| AmyE                             | <i>degUHy32, amyE::xylRPxylAcomK-ermC, aprE::PaprE-amyE catR Tbpn'</i> ; Em <sup>R</sup> ; Cm <sup>R</sup>                                       | [1]                        |
| AmyL                             | <i>degUHy32, amyE::xylRPxylAcomK-ermC, aprE::PaprE-amyL catR Tbpn'</i> ; Em <sup>R</sup> ; Cm <sup>R</sup>                                       | [1]                        |
| BPN'                             | <i>degUHy32, amyE::xylRPxylAcomK-ermC, aprE::PaprE-bpn' catR Tbpn'</i> ; Em <sup>R</sup> ; Cm <sup>R</sup>                                       | [1]                        |
| $\Delta dnaK$                    | <i>degUHy32, amyE::xylRPxylAcomK-ermC, \Delta upp::neoR, \Delta dnaK::upp-phleoR-cl</i> Em <sup>R</sup> ; Phleo <sup>R</sup> ; Neo <sup>S</sup>  | This study                 |
| $\Delta secG$                    | <i>degUHy32, amyE::xylRPxylAcomK-ermC, \Delta upp::neoR, \Delta secG::upp-phleoR-cl</i> Em <sup>R</sup> ; Phleo <sup>R</sup> ; Neo <sup>S</sup>  | This study                 |
| $\Delta secDF$                   | <i>degUHy32, amyE::xylRPxylAcomK-ermC, \Delta upp::neoR, \Delta secDF::upp-phleoR-cl</i> Em <sup>R</sup> ; Phleo <sup>R</sup> ; Neo <sup>S</sup> | This study                 |
| $\Delta sipS$                    | <i>degUHy32, amyE::xylRPxylAcomK-ermC, \Delta upp::neoR, \Delta sipS::upp-phleoR-cl</i> Em <sup>R</sup> ; Phleo <sup>R</sup> ; Neo <sup>S</sup>  | This study                 |
| $\Delta sipT$                    | <i>degUHy32, amyE::xylRPxylAcomK-ermC, \Delta upp::neoR, \Delta sipT::upp-phleoR-cl</i> Em <sup>R</sup> ; Phleo <sup>R</sup> ; Neo <sup>S</sup>  | This study                 |
| $\Delta sipU$                    | <i>degUHy32, amyE::xylRPxylAcomK-ermC, \Delta upp::neoR, \Delta sipU::upp-phleoR-cl</i> Em <sup>R</sup> ; Phleo <sup>R</sup> ; Neo <sup>S</sup>  | This study                 |
| $\Delta sipV$                    | <i>degUHy32, amyE::xylRPxylAcomK-ermC, \Delta upp::neoR, \Delta sipV::upp-phleoR-cl</i> Em <sup>R</sup> ; Phleo <sup>R</sup> ; Neo <sup>S</sup>  | This study                 |
| $\Delta sipW$                    | <i>degUHy32, amyE::xylRPxylAcomK-ermC, \Delta upp::neoR, \Delta sipW::upp-phleoR-cl</i> Em <sup>R</sup> ; Phleo <sup>R</sup> ; Neo <sup>S</sup>  | This study                 |
| $\Delta sppA$                    | <i>degUHy32, amyE::xylRPxylAcomK-ermC, \Delta upp::neoR, \Delta sppA::upp-phleoR-cl</i> Em <sup>R</sup> ; Phleo <sup>R</sup> ; Neo <sup>S</sup>  | This study                 |
| $\Delta tepA$                    | <i>degUHy32, amyE::xylRPxylAcomK-ermC, \Delta upp::neoR, \Delta tepA::upp-phleoR-cl</i> Em <sup>R</sup> ; Phleo <sup>R</sup> ; Neo <sup>S</sup>  | This study                 |
| $\Delta prsW$                    | <i>degUHy32, amyE::xylRPxylAcomK-ermC, \Delta upp::neoR, \Delta prsW::upp-phleoR-cl</i> Em <sup>R</sup> ; Phleo <sup>R</sup> ; Neo <sup>S</sup>  | This study                 |
| $\Delta wprA$                    | <i>degUHy32, amyE::xylRPxylAcomK-ermC, \Delta upp::neoR, \Delta wprA::specR</i> Em <sup>R</sup> ; Spec <sup>R</sup> ; Neo <sup>R</sup>           | This study                 |
| $\Delta htrA$                    | <i>degUHy32, amyE::xylRPxylAcomK-ermC, \Delta upp::neoR, \Delta htrA::upp-phleoR-cl</i> Em <sup>R</sup> ; Phleo <sup>R</sup> ; Neo <sup>S</sup>  | This study                 |

|                    |                                                                                                                                                                                      |            |
|--------------------|--------------------------------------------------------------------------------------------------------------------------------------------------------------------------------------|------------|
| <i>ΔhtrB</i>       | <i>degUHy32, amyE::xylRPxylAcomK-ermC, Δupp::neoR, ΔhtrB::upp-phleoR-cl Em<sup>R</sup>; Phleo<sup>R</sup>; Neo<sup>S</sup></i>                                                       | This study |
| <i>ΔyqeZ</i>       | <i>degUHy32, amyE::xylRPxylAcomK-ermC, Δupp::neoR, ΔyqeZ::upp-phleoR-cl Em<sup>R</sup>; Phleo<sup>R</sup>; Neo<sup>S</sup></i>                                                       | This study |
| <i>AmyE ΔdnaK</i>  | <i>degUHy32, amyE::xylRPxylAcomK-ermC, Δupp::neoR, ΔdnaK::upp-phleoR-cl aprE::PapE-amyE catR</i><br><i>Tbpn' Em<sup>R</sup>; Phleo<sup>R</sup>; Neo<sup>S</sup>; Cm<sup>R</sup></i>  | This study |
| <i>AmyE ΔsecG</i>  | <i>degUHy32, amyE::xylRPxylAcomK-ermC, Δupp::neoR, ΔsecG::upp-phleoR-cl aprE::PapE-amyE catR</i><br><i>Tbpn' Em<sup>R</sup>; Phleo<sup>R</sup>; Neo<sup>S</sup>; Cm<sup>R</sup></i>  | This study |
| <i>AmyE ΔsecDF</i> | <i>degUHy32, amyE::xylRPxylAcomK-ermC, Δupp::neoR, ΔsecDF::upp-phleoR-cl aprE::PapE-amyE</i><br><i>catR Tbpn' Em<sup>R</sup>; Phleo<sup>R</sup>; Neo<sup>S</sup>; Cm<sup>R</sup></i> | This study |
| <i>AmyE ΔsipS</i>  | <i>degUHy32, amyE::xylRPxylAcomK-ermC, Δupp::neoR, ΔsipS::upp-phleoR-cl aprE::PapE-amyE catR</i><br><i>Tbpn' Em<sup>R</sup>; Phleo<sup>R</sup>; Neo<sup>S</sup>; Cm<sup>R</sup></i>  | This study |
| <i>AmyE ΔsipT</i>  | <i>degUHy32, amyE::xylRPxylAcomK-ermC, Δupp::neoR, ΔsipT::upp-phleoR-cl aprE::PapE-amyE catR</i><br><i>Tbpn' Em<sup>R</sup>; Phleo<sup>R</sup>; Neo<sup>S</sup>; Cm<sup>R</sup></i>  | This study |
| <i>AmyE ΔsipU</i>  | <i>degUHy32, amyE::xylRPxylAcomK-ermC, Δupp::neoR, ΔsipU::upp-phleoR-cl aprE::PapE-amyE catR</i><br><i>Tbpn' Em<sup>R</sup>; Phleo<sup>R</sup>; Neo<sup>S</sup>; Cm<sup>R</sup></i>  | This study |
| <i>AmyE ΔsipV</i>  | <i>degUHy32, amyE::xylRPxylAcomK-ermC, Δupp::neoR, ΔsipV::upp-phleoR-cl aprE::PapE-amyE catR</i><br><i>Tbpn' Em<sup>R</sup>; Phleo<sup>R</sup>; Neo<sup>S</sup>; Cm<sup>R</sup></i>  | This study |
| <i>AmyE ΔsipW</i>  | <i>degUHy32, amyE::xylRPxylAcomK-ermC, Δupp::neoR, ΔsipW::upp-phleoR-cl aprE::PapE-amyE catR</i><br><i>Tbpn' Em<sup>R</sup>; Phleo<sup>R</sup>; Neo<sup>S</sup>; Cm<sup>R</sup></i>  | This study |
| <i>AmyE ΔsppA</i>  | <i>degUHy32, amyE::xylRPxylAcomK-ermC, Δupp::neoR, ΔsppA::upp-phleoR-cl aprE::PapE-amyE catR</i><br><i>Tbpn' Em<sup>R</sup>; Phleo<sup>R</sup>; Neo<sup>S</sup>; Cm<sup>R</sup></i>  | This study |

|                     |                                                                                                                                                                                                                |            |
|---------------------|----------------------------------------------------------------------------------------------------------------------------------------------------------------------------------------------------------------|------------|
| AmyE $\Delta tepA$  | <i>degUHy32, amyE::xylRPxylAcomK-ermC, <math>\Delta upp::neoR, \Delta tepA::upp-phleoR-cl aprE::PaprE-amyE catR</math></i><br><i>Tbpn' Em<sup>R</sup>; Phleo<sup>R</sup>; Neo<sup>S</sup>; Cm<sup>R</sup></i>  | This study |
| AmyE $\Delta prsW$  | <i>degUHy32, amyE::xylRPxylAcomK-ermC, <math>\Delta upp::neoR, \Delta prsW::upp-phleoR-cl aprE::PaprE-amyE catR</math></i><br><i>Tbpn' Em<sup>R</sup>; Phleo<sup>R</sup>; Neo<sup>S</sup>; Cm<sup>R</sup></i>  | This study |
| AmyE $\Delta wprA$  | <i>degUHy32, amyE::xylRPxylAcomK-ermC, <math>\Delta upp::neoR, \Delta wprA::specR aprE::PaprE-amyE catR</math></i> <i>Tbpn'</i><br><i>Em<sup>R</sup>; Spec<sup>R</sup>; Neo<sup>R</sup>; Cm<sup>R</sup></i>    | This study |
| AmyE $\Delta htrA$  | <i>degUHy32, amyE::xylRPxylAcomK-ermC, <math>\Delta upp::neoR, \Delta htrA::upp-phleoR-cl aprE::PaprE-amyE catR</math></i><br><i>Tbpn' Em<sup>R</sup>; Phleo<sup>R</sup>; Neo<sup>S</sup>; Cm<sup>R</sup></i>  | This study |
| AmyE $\Delta htrB$  | <i>degUHy32, amyE::xylRPxylAcomK-ermC, <math>\Delta upp::neoR, \Delta htrB::upp-phleoR-cl aprE::PaprE-amyE catR</math></i><br><i>Tbpn' Em<sup>R</sup>; Phleo<sup>R</sup>; Neo<sup>S</sup>; Cm<sup>R</sup></i>  | This study |
| AmyE $\Delta yqeZ$  | <i>degUHy32, amyE::xylRPxylAcomK-ermC, <math>\Delta upp::neoR, \Delta yqeZ::upp-phleoR-cl aprE::PaprE-amyE catR</math></i><br><i>Tbpn' Em<sup>R</sup>; Phleo<sup>R</sup>; Neo<sup>S</sup>; Cm<sup>R</sup></i>  | This study |
| AmyL $\Delta dnaK$  | <i>degUHy32, amyE::xylRPxylAcomK-ermC, <math>\Delta upp::neoR, \Delta dnaK::upp-phleoR-cl aprE::PaprE-amyL catR</math></i><br><i>Tbpn' Em<sup>R</sup>; Phleo<sup>R</sup>; Neo<sup>S</sup>; Cm<sup>R</sup></i>  | This study |
| AmyL $\Delta secG$  | <i>degUHy32, amyE::xylRPxylAcomK-ermC, <math>\Delta upp::neoR, \Delta secG::upp-phleoR-cl aprE::PaprE-amyL catR</math></i><br><i>Tbpn' Em<sup>R</sup>; Phleo<sup>R</sup>; Neo<sup>S</sup>; Cm<sup>R</sup></i>  | This study |
| AmyL $\Delta secDF$ | <i>degUHy32, amyE::xylRPxylAcomK-ermC, <math>\Delta upp::neoR, \Delta secDF::upp-phleoR-cl aprE::PaprE-amyL</math></i><br><i>catR Tbpn' Em<sup>R</sup>; Phleo<sup>R</sup>; Neo<sup>S</sup>; Cm<sup>R</sup></i> | This study |
| AmyL $\Delta sipS$  | <i>degUHy32, amyE::xylRPxylAcomK-ermC, <math>\Delta upp::neoR, \Delta sipS::upp-phleoR-cl aprE::PaprE-amyL catR</math></i><br><i>Tbpn' Em<sup>R</sup>; Phleo<sup>R</sup>; Neo<sup>S</sup>; Cm<sup>R</sup></i>  | This study |

|                    |                                                                                                                                                                                                               |            |
|--------------------|---------------------------------------------------------------------------------------------------------------------------------------------------------------------------------------------------------------|------------|
| AmyL $\Delta sipT$ | <i>degUHy32, amyE::xylRPxylAcomK-ermC, <math>\Delta upp::neoR, \Delta sipT::upp-phleoR-cl aprE::PaprE-amyL catR</math></i><br><i>Tbpn' Em<sup>R</sup>; Phleo<sup>R</sup>; Neo<sup>S</sup>; Cm<sup>R</sup></i> | This study |
| AmyL $\Delta sipU$ | <i>degUHy32, amyE::xylRPxylAcomK-ermC, <math>\Delta upp::neoR, \Delta sipU::upp-phleoR-cl aprE::PaprE-amyL catR</math></i><br><i>Tbpn' Em<sup>R</sup>; Phleo<sup>R</sup>; Neo<sup>S</sup>; Cm<sup>R</sup></i> | This study |
| AmyL $\Delta sipV$ | <i>degUHy32, amyE::xylRPxylAcomK-ermC, <math>\Delta upp::neoR, \Delta sipV::upp-phleoR-cl aprE::PaprE-amyL catR</math></i><br><i>Tbpn' Em<sup>R</sup>; Phleo<sup>R</sup>; Neo<sup>S</sup>; Cm<sup>R</sup></i> | This study |
| AmyL $\Delta sipW$ | <i>degUHy32, amyE::xylRPxylAcomK-ermC, <math>\Delta upp::neoR, \Delta sipW::upp-phleoR-cl aprE::PaprE-amyL catR</math></i><br><i>Tbpn' Em<sup>R</sup>; Phleo<sup>R</sup>; Neo<sup>S</sup>; Cm<sup>R</sup></i> | This study |
| AmyL $\Delta sppA$ | <i>degUHy32, amyE::xylRPxylAcomK-ermC, <math>\Delta upp::neoR, \Delta sppA::upp-phleoR-cl aprE::PaprE-amyL catR</math></i><br><i>Tbpn' Em<sup>R</sup>; Phleo<sup>R</sup>; Neo<sup>S</sup>; Cm<sup>R</sup></i> | This study |
| AmyL $\Delta tepA$ | <i>degUHy32, amyE::xylRPxylAcomK-ermC, <math>\Delta upp::neoR, \Delta tepA::upp-phleoR-cl aprE::PaprE-amyL catR</math></i><br><i>Tbpn' Em<sup>R</sup>; Phleo<sup>R</sup>; Neo<sup>S</sup>; Cm<sup>R</sup></i> | This study |
| AmyL $\Delta prsW$ | <i>degUHy32, amyE::xylRPxylAcomK-ermC, <math>\Delta upp::neoR, \Delta prsW::upp-phleoR-cl aprE::PaprE-amyL catR</math></i><br><i>Tbpn' Em<sup>R</sup>; Phleo<sup>R</sup>; Neo<sup>S</sup>; Cm<sup>R</sup></i> | This study |
| AmyL $\Delta wprA$ | <i>degUHy32, amyE::xylRPxylAcomK-ermC, <math>\Delta upp::neoR, \Delta wprA::specR aprE::PaprE-amyL catR</math></i> <i>Tbpn'</i><br><i>Em<sup>R</sup>; Spec<sup>R</sup>; Neo<sup>R</sup>; Cm<sup>R</sup></i>   | This study |
| AmyL $\Delta htrA$ | <i>degUHy32, amyE::xylRPxylAcomK-ermC, <math>\Delta upp::neoR, \Delta htrA::upp-phleoR-cl aprE::PaprE-amyL catR</math></i><br><i>Tbpn' Em<sup>R</sup>; Phleo<sup>R</sup>; Neo<sup>S</sup>; Cm<sup>R</sup></i> | This study |
| AmyL $\Delta htrB$ | <i>degUHy32, amyE::xylRPxylAcomK-ermC, <math>\Delta upp::neoR, \Delta htrB::upp-phleoR-cl aprE::PaprE-amyL catR</math></i><br><i>Tbpn' Em<sup>R</sup>; Phleo<sup>R</sup>; Neo<sup>S</sup>; Cm<sup>R</sup></i> | This study |

|                     |                                                                                                                                                                                                                |            |
|---------------------|----------------------------------------------------------------------------------------------------------------------------------------------------------------------------------------------------------------|------------|
| AmyL $\Delta yqeZ$  | <i>degUHy32, amyE::xylRPxylAcomK-ermC, <math>\Delta upp::neoR, \Delta yqeZ::upp-phleoR-cl aprE::PaprE-amyL catR</math></i><br><i>Tbpn' Em<sup>R</sup>; Phleo<sup>R</sup>; Neo<sup>S</sup>; Cm<sup>R</sup></i>  | This study |
| BPN' $\Delta dnaK$  | <i>degUHy32, amyE::xylRPxylAcomK-ermC, <math>\Delta upp::neoR, \Delta dnaK::upp-phleoR-cl aprE::PaprE-bpn' catR</math></i><br><i>Tbpn' Em<sup>R</sup>; Phleo<sup>R</sup>; Neo<sup>S</sup>; Cm<sup>R</sup></i>  | This study |
| BPN' $\Delta secG$  | <i>degUHy32, amyE::xylRPxylAcomK-ermC, <math>\Delta upp::neoR, \Delta secG::upp-phleoR-cl aprE::PaprE-bpn' catR</math></i><br><i>Tbpn' Em<sup>R</sup>; Phleo<sup>R</sup>; Neo<sup>S</sup>; Cm<sup>R</sup></i>  | This study |
| BPN' $\Delta secDF$ | <i>degUHy32, amyE::xylRPxylAcomK-ermC, <math>\Delta upp::neoR, \Delta secDF::upp-phleoR-cl aprE::PaprE-bpn' catR</math></i><br><i>Tbpn' Em<sup>R</sup>; Phleo<sup>R</sup>; Neo<sup>S</sup>; Cm<sup>R</sup></i> | This study |
| BPN' $\Delta sipS$  | <i>degUHy32, amyE::xylRPxylAcomK-ermC, <math>\Delta upp::neoR, \Delta sipS::upp-phleoR-cl aprE::PaprE-bpn' catR</math></i><br><i>Tbpn' Em<sup>R</sup>; Phleo<sup>R</sup>; Neo<sup>S</sup>; Cm<sup>R</sup></i>  | This study |
| BPN' $\Delta sipT$  | <i>degUHy32, amyE::xylRPxylAcomK-ermC, <math>\Delta upp::neoR, \Delta sipT::upp-phleoR-cl aprE::PaprE-bpn' catR</math></i><br><i>Tbpn' Em<sup>R</sup>; Phleo<sup>R</sup>; Neo<sup>S</sup>; Cm<sup>R</sup></i>  | This study |
| BPN' $\Delta sipU$  | <i>degUHy32, amyE::xylRPxylAcomK-ermC, <math>\Delta upp::neoR, \Delta sipU::upp-phleoR-cl aprE::PaprE-bpn' catR</math></i><br><i>Tbpn' Em<sup>R</sup>; Phleo<sup>R</sup>; Neo<sup>S</sup>; Cm<sup>R</sup></i>  | This study |
| BPN' $\Delta sipV$  | <i>degUHy32, amyE::xylRPxylAcomK-ermC, <math>\Delta upp::neoR, \Delta sipV::upp-phleoR-cl aprE::PaprE-bpn' catR</math></i><br><i>Tbpn' Em<sup>R</sup>; Phleo<sup>R</sup>; Neo<sup>S</sup>; Cm<sup>R</sup></i>  | This study |
| BPN' $\Delta sipW$  | <i>degUHy32, amyE::xylRPxylAcomK-ermC, <math>\Delta upp::neoR, \Delta sipW::upp-phleoR-cl aprE::PaprE-bpn' catR</math></i><br><i>Tbpn' Em<sup>R</sup>; Phleo<sup>R</sup>; Neo<sup>S</sup>; Cm<sup>R</sup></i>  | This study |
| BPN' $\Delta sppA$  | <i>degUHy32, amyE::xylRPxylAcomK-ermC, <math>\Delta upp::neoR, \Delta sppA::upp-phleoR-cl aprE::PaprE-bpn' catR</math></i><br><i>Tbpn' Em<sup>R</sup>; Phleo<sup>R</sup>; Neo<sup>S</sup>; Cm<sup>R</sup></i>  | This study |

|                    |                                                                                                                                                                                                               |            |
|--------------------|---------------------------------------------------------------------------------------------------------------------------------------------------------------------------------------------------------------|------------|
| BPN' $\Delta tepA$ | <i>degUHy32, amyE::xylRPxylAcomK-ermC, <math>\Delta upp::neoR, \Delta tepA::upp-phleoR-cl aprE::PaprE-bpn' catR</math></i><br><i>Tbpn' Em<sup>R</sup>; Phleo<sup>R</sup>; Neo<sup>S</sup>; Cm<sup>R</sup></i> | This study |
| BPN' $\Delta prsW$ | <i>degUHy32, amyE::xylRPxylAcomK-ermC, <math>\Delta upp::neoR, \Delta prsW::upp-phleoR-cl aprE::PaprE-bpn' catR</math></i><br><i>Tbpn' Em<sup>R</sup>; Phleo<sup>R</sup>; Neo<sup>S</sup>; Cm<sup>R</sup></i> | This study |
| BPN' $\Delta wprA$ | <i>degUHy32, amyE::xylRPxylAcomK-ermC, <math>\Delta upp::neoR, \Delta wprA::specR aprE::PaprE-bpn' catR</math></i> <i>Tbpn'</i><br><i>Em<sup>R</sup>; Spec<sup>R</sup>; Neo<sup>R</sup>; Cm<sup>R</sup></i>   | This study |
| BPN' $\Delta htrA$ | <i>degUHy32, amyE::xylRPxylAcomK-ermC, <math>\Delta upp::neoR, \Delta htrA::upp-phleoR-cl aprE::PaprE-bpn' catR</math></i><br><i>Tbpn' Em<sup>R</sup>; Phleo<sup>R</sup>; Neo<sup>S</sup>; Cm<sup>R</sup></i> | This study |
| BPN' $\Delta htrB$ | <i>degUHy32, amyE::xylRPxylAcomK-ermC, <math>\Delta upp::neoR, \Delta htrB::upp-phleoR-cl aprE::PaprE-bpn' catR</math></i><br><i>Tbpn' Em<sup>R</sup>; Phleo<sup>R</sup>; Neo<sup>S</sup>; Cm<sup>R</sup></i> | This study |
| BPN' $\Delta yqeZ$ | <i>degUHy32, amyE::xylRPxylAcomK-ermC, <math>\Delta upp::neoR, \Delta yqeZ::upp-phleoR-cl aprE::PaprE-bpn' catR</math></i><br><i>Tbpn' Em<sup>R</sup>; Phleo<sup>R</sup>; Neo<sup>S</sup>; Cm<sup>R</sup></i> | This study |

*Tbpn'*, terminator structure of *B. amyloliquefaciens bpn'*; Em<sup>R</sup>, Erythromycin resistant; Phleo<sup>R</sup>, Phleomycin resistant; Neo<sup>R</sup>, Neomycin resistant; Neo<sup>S</sup>, Neomycin sensitive; Cm<sup>R</sup>, Chloramphenicol resistant; Spec<sup>R</sup>, Spectinomycin resistant

**Table S2:** Primers used in this study

| Target gene        | Primer name | 5'→3' nucleotide sequence                                                           |
|--------------------|-------------|-------------------------------------------------------------------------------------|
|                    | CI2.rev     | CTTCAACGCTAACTTTGAG                                                                 |
| <b>Chaperone</b>   |             |                                                                                     |
| <i>dnaK</i>        | dnaK.P0     | CATTCATCCTCAGGACGTGTTC                                                              |
|                    | dnaK.P1     | CTATGTTGACCATTTGCTGTCACC                                                            |
|                    | dnaK.P2     | CGACCTGCAGGCATGCAAGCTTTGAATAACCTCCTGCTATGTAATTATTG                                  |
|                    | dnaK.P3     | CGAGCTCGAATTCAGTGGCCGTCGCAATAATTACATAGCAGGAGGTTATTCAAGTTCCTTTTAGTGTCAGC<br>CCCG     |
|                    | dnaK.P4     | TAAATCAAGCGGGTCCTCTATCAC                                                            |
| <b>Translocase</b> |             |                                                                                     |
| <i>secG</i>        | secG.P0     | CCAGCCTTGACATAAGCCCC                                                                |
|                    | secG.P1     | GCCTCTGCCAGTTTTTTGATG                                                               |
|                    | secG.P2     | CGACCTGCAGGCATGCAAGCTCCCATACACCTCCAGACTCAC                                          |
|                    | secG.P3     | CGAGCTCGAATTCAGTGGCCGTCGGTAATGTAGCCAGTGAGTCTGGAGGTGTATGGGGGCAATGTTTGTA<br>TAAGGTCTG |
|                    | secG.P4     | GAGAATGGTTTCAACCTCACCC                                                              |
| <i>secDF</i>       | secDF.P0    | GCACAGCTTGAAGCGGG                                                                   |
|                    | secDF.P1    | GGGGCCATCACTTTTATAAATACAG                                                           |
|                    | secDF.P2    | CGACCTGCAGGCATGCAAGCTTATGTATATCCTCCCTTAAACCTGTGC                                    |



|             |                          |                                                                                    |
|-------------|--------------------------|------------------------------------------------------------------------------------|
|             | secDF.P3                 | CGAGCTCGAATTCACTGGCCGTCGGATTCGCACAGGTTTAAGGGAGGATATACATAAAAATATCAGGCTG<br>TCCTCTGC |
|             | secDF.P4                 | CCGACAGTTTTTGCAGCG                                                                 |
|             | <b>Signal peptidases</b> |                                                                                    |
| <i>sipS</i> | sipS.P0                  | CCTGACTCGGTGGCAGAAC                                                                |
|             | sipS.P1                  | CCCGCCATAGACAATGTTG                                                                |
|             | sipS.P2                  | CGACCTGCAGGCATGCAAGCTCTGATTTCTCCAATAAACAACG                                        |
|             | sipS.P3                  | CGAGCTCGAATTCACTGGCCGTCGGAAGACCGTTGTTTATTGGAGGAAATCAGGATCAAGCAGCTTCCCA<br>TTG      |
|             | sipS.P4                  | GCAGCCTCTGACGTGATCC                                                                |
| <i>sipT</i> | sipT.P0                  | GGCACCAGCACCTGCC                                                                   |
|             | sipT.P1                  | GCCCGACAGGTATTGCC                                                                  |
|             | sipT.P2                  | CGACCTGCAGGCATGCAAGCTAGTGTTTCCTCCTAGACAATTGCTATG                                   |
|             | sipT.P3                  | CGAGCTCGAATTCACTGGCCGTCGCAACTGACATAGCAATTGTCTAGGAGGAAACTAAACGCCTTGCT<br>GGCCTAG    |
|             | sipT.P4                  | CAAGCACCTTTACGCCATCG                                                               |
| <i>sipU</i> | sipU.P0                  | GGCTTTAAGCAAACCTGAACACG                                                            |
|             | sipU.P1                  | GATGTGACCCGCGTAGCG                                                                 |
|             | sipU.P2                  | CGACCTGCAGGCATGCAAGCTCTTCCTTCACCCGATGCTTTC                                         |

|                                           |         |                                                                                     |
|-------------------------------------------|---------|-------------------------------------------------------------------------------------|
| <i>sipV</i>                               | sipU.P3 | CGAGCTCGAATTCACTGGCCGTCGGGAATTCTTAGGAAAGCATCGGGTGAAGGAAGAATGCAATGCAAA<br>AAGAACATGG |
|                                           | sipU.P4 | CAGCTTGATATCTACATCTTCTCTTTGAAC                                                      |
|                                           | sipV.P0 | GGGCGCGTATAACCGAG                                                                   |
|                                           | sipV.P1 | CCGAAGATGATGATGAGAGCTG                                                              |
|                                           | sipV.P2 | CGACCTGCAGGCATGCAAGCTGTTACTGTCTCCCTCCATCATGC                                        |
|                                           | sipV.P3 | CGAGCTCGAATTCACTGGCCGTCGCAGCGTGAGCATGATGGAGGGAGACAGTAACAAAGACGCTAATTG<br>AAGAGGCG   |
| <i>sipW</i>                               | sipV.P4 | CCAGCAGCTCCGACATC                                                                   |
|                                           | sipW.P0 | GATGGACAGAATAAAACAGTGTAAGG                                                          |
|                                           | sipW.P1 | CTCCGAGAGATGAGCGAAAAG                                                               |
|                                           | sipW.P2 | CGACCTGCAGGCATGCAAGCTTGCTTTTTTTCATCCTCTTCCC                                         |
|                                           | sipW.P3 | CGAGCTCGAATTCACTGGCCGTCGCCAGAAGGAAAGCGGGGAAGAGGATGAAAAAAGCACTTCAGTTGT<br>AAACCTGGCA |
|                                           | sipW.P4 | GCCGGACTGGCTGAAATAC                                                                 |
| <b>Cell envelope-associated proteases</b> |         |                                                                                     |
| <i>sppA</i>                               | sppA.P0 | GCATGATCGGCTTATTCATGC                                                               |
|                                           | sppA.p1 | CGCATGCCGATCGCAC                                                                    |
|                                           | sppA.P2 | CGACCTGCAGGCATGCAAGCTTTTTTCTCCTCCTTTTTCTCTAAACTC                                    |

|             |                    |                                                                                  |
|-------------|--------------------|----------------------------------------------------------------------------------|
| <i>tepA</i> | sppA.P3            | CGAGCTCGAATTCCTGGCCGTCGGAGAGAGTTTAGGAAAAGGAGGAGAAAAGAGGGGAACAATAAT<br>GGACGCG    |
|             | sppA.P4            | CGCGATCGGCGTAATGG                                                                |
|             | tepA.P0            | CGCACGGGCACGATG                                                                  |
|             | tepA.P1            | CTGTCCGTTCCAGTGTACGG                                                             |
|             | tepA.P2            | CGACCTGCAGGCATGCAAGCTCTCGCTTTCATCCTTTCCG                                         |
|             | tepA.P3            | CGAGCTCGAATTCCTGGCCGTCGCAAAGAGAACTCGGAAAGGATGAAAGCGAGTTCTTTATACCGTGA<br>TGCCTCAG |
| <i>prsW</i> | tepA.P4            | GGTCTGTCATTCAATTTAGACTCCAG                                                       |
|             | prsW.P0            | CCAAGGCTTCTACTGGAGTGAAG                                                          |
|             | prsW.P1            | GGTAGAAGAAAAATTAGAAAAATGATGG                                                     |
|             | prsW.P2            | CGACCTGCAGGCATGCAAGCTCAGGCAACCTCTTTCCTTTATATTC                                   |
|             | prsW.P3            | CGAGCTCGAATTCCTGGCCGTCGGAATATAAAGGAAAGAGGTTGCCTG AAGCCGCACAGCAACCGTGC            |
| <i>wprA</i> | prsW.P4            | GCGGCAGCTGACTGACGCTG                                                             |
|             | wprA.P0            | GTAGAGCAAGCCCGTCCTG                                                              |
|             | wprA.P1            | GCGACAGGGGAACCTTACAAC                                                            |
|             | wprA.P2            | CGACCTGCAGGCATGCAAGCTGTTATCCCTCCTGCAAATAATGAATC                                  |
|             | wprA.P3            | CGAGCTCGAATTCCTGGCCGTCGCCTTCAAGGAGATTCATTATTTGCAGGAGGGATAACCCAAAAAGC<br>GGTGCTCG |
| wprA.P4     | GCCGCAATCGCTGTAATC |                                                                                  |

|             |         |                                                                                          |
|-------------|---------|------------------------------------------------------------------------------------------|
| <i>htrA</i> | htrA.P0 | GCCGCCCGGTCATCCCC                                                                        |
|             | htrA.P1 | CCGATCGTTTATGTAAAAATGACG                                                                 |
|             | htrA.P2 | CGACCTGCAGGCATGCAAGCTCATGTTCACTCCGTTTCTCTATT                                             |
|             | htrA.P3 | CGAGCTCGAATTCCTGGCCGTCGAATAGAGAAACGGAGTGAACATGGACATAATGCCTCAGGCCG                        |
|             | htrA.P4 | GATACATCAAGCAGCAAGGCTTC                                                                  |
| <i>htrB</i> | htrB.P0 | CCGGTCCACTTTTACTGGG                                                                      |
|             | htrB.P1 | CAAGCCAAATAGCCGGAATCC                                                                    |
|             | htrB.P2 | CGACCTGCAGGCATGCAAGCTGTTCTTACACTCCTTTAACGGTTATTC                                         |
|             | htrB.P3 | CGAGCTCGAATTCCTGGCCGTCGGAATAACCGTTAAAGGAGTGTAGAACGAAAAAACAAAAAGCTGA<br>ACCCGAT           |
|             | htrB.P4 | CCATCGTGACAGGAGCGTC                                                                      |
| <i>yqeZ</i> | yqeZ.P0 | CGCTGCGGTCAGAAAAGG                                                                       |
|             | yqeZ.P1 | CCACATGGGCATATGCTGTC                                                                     |
|             | yqeZ.P2 | CGACCTGCAGGCATGCAAGCTGGGCGGTGTATCCCTCC                                                   |
|             | yqeZ.P3 | CGAGCTCGAATTCCTGGCCGTCGCTTATTATAAAAGGAAGGAGGGATACACCGCCCATAGAAACGAGGA<br>GAAGTTATATGGATC |
|             | yqeZ.P4 | GAACGATCCCCTGTACGACG                                                                     |

## References

1. Neef J, Bongiorni C, Goosens VJ, Schmidt B, van Dijl JM: **Intramembrane protease RasP boosts protein production in *Bacillus***. *Microb Cell Fact* 2017, **16**(1):57-017.
